# Supplementary material
Source: ML conference proceedings conference paper supplement (https://proceedings.neurips.cc/paper_files/paper/2019/hash/bc047286b224b7bfa73d4cb02de1238d-Abstract.html)
Supplement: Supplementary file [file bc047286b224b7bfa73d4cb02de1238d-Supplemental.zip]

---

# Supplementary materials

---

**Jean Pouget-Abadie**  
Google Research  
New York, NY 10011  
jeanpa@google.com

**Kevin Aydin**  
Google Research  
Mountain View, CA 94043  
kaydin@google.com

**Warren Schudy**  
Google Research  
New York, NY 10011  
wschudy@google.com

**Kay Brodersen**  
Google  
Zürich, Switzerland  
kbrodersen@google.com

**Vahab Mirrokni**  
Google Research  
New York, NY 10011  
mirrokni@google.com

## 1 Debiasing inference with a generalized propensity score approach

When realized treatment exposures are correlated with potential outcomes, the dose-response literature has suggested generalizations of the propensity score to de-bias inference. Hirano and Imbens (2004) define the *generalized propensity score* function  $r : (e, \mathbf{X}) \mapsto r(e, \mathbf{X})$  as the density of the conditional distribution of outcome unit  $i$ 's treatment exposure given its covariates  $\mathbf{X}_i$ . They suggest learning the generalized propensity score function  $r(\cdot, \cdot)$  as well as the conditional outcome distribution  $\beta : (e', r') \mapsto E[Y_i | e_i = e', r(e', \mathbf{X}_i) = r']$ , conditioned on treatment exposure  $e'$  and generalized propensity score  $r'$ . Finally, they propose  $\hat{\mu}(e) = 1/N \sum_i \beta(e, r(e, \mathbf{X}_i))$  as an estimator for the average dose-response function  $\mu$ . In our case, the treatment exposure distribution of outcome unit  $i$  is known and fully parameterized by its outgoing-edge weights  $\{w_{ij}\}_j$ .

In practice, Hirano and Imbens (2004) suggest fitting a linear regression of  $Y_i$  on the realized treatment exposure and corresponding propensity score couplet  $(e_i, r(e_i, \mathbf{X}_i))$  to construct an approximation  $\hat{\beta}$  of the conditional outcome distribution  $\beta$ , necessary for computing  $\hat{\mu}$ . Imai and Van Dyk (2004) propose a similar approach, which stratifies outcome units into  $S$  strata by any uni- or multivariate parameter  $\theta_i$  such that  $r(\cdot, \mathbf{X}_i) = r(\cdot, \theta_i)$ , and learns  $\hat{f}_s$  within each strata such that  $Y_i(\mathbf{Z}) = f_s(e_i(\mathbf{Z}))$ . They suggest using  $\hat{f}(\cdot) = 1/S \sum_s \sum_{i \in s} \hat{f}_s(\cdot) W_s$  as an estimator for the average dose response function  $\mu$ , where  $W_s$  is the number of outcome units in strata  $S$ .

## 2 Proof of Proposition 1

To prove Proposition 1, we consider a rewriting of the objective from Theorem 1.

$$\Delta = p - \frac{p(1-p)}{N} \sum_{\mathcal{C} \neq \mathcal{C}'} \sum_{j \in \mathcal{C}, k \in \mathcal{C}'} \langle \phi_j, \phi_k \rangle - \frac{p(1-p)}{N^2} \sum_{\mathcal{C}} \left( \sum_{j \in \mathcal{C}} \langle \phi_j, \vec{1} \rangle \right)^2$$

We decompose this objective term-by-term. For all diversion unit pairs  $j, k \in [1, M]$ ,  $\langle \phi_j, \phi_k \rangle \geq 0$ , with equality if and only if diversion unit  $j$  and diversion unit  $k$  have no common outcome unit neighbors. As a result,  $\sum_{\mathcal{C} \neq \mathcal{C}'} \sum_{j \in \mathcal{C}, k \in \mathcal{C}'} \langle \phi_j, \phi_k \rangle \geq 0$ , with equality if and only if clusters  $\mathcal{C}$  and  $\mathcal{C}'$  have no common outcome unit neighbors. Furthermore, the following equality holds:  $\sum_{\mathcal{C}} \sum_{j \in \mathcal{C}} \langle \phi_j, \vec{1} \rangle = N$ . From the Cauchy-Schwarz inequality,  $\sum_{\mathcal{C}} \left( \sum_{j \in \mathcal{C}} \langle \phi_j, \vec{1} \rangle \right)^2 \geq N^2/K$ , where  $K$  is the total number of clusters  $\mathcal{C}$ , with equality if and only if  $\forall \mathcal{C}, \mathcal{C}', \sum_{j \in \mathcal{C}} \langle \phi_j, \vec{1} \rangle =$

$\sum_{j \in \mathcal{C}'} \langle \phi_j, \vec{1} \rangle = N/K$ . If there exists a clustering  $\{\mathcal{C}\}_K$  with  $K$  clusters, such that the variance maximization objective for  $\{\mathcal{C}\}_K$  is equal to  $p - \frac{p(1-p)}{K}$ , then  $\{\mathcal{C}\}_K$  cuts no edges of the bipartite graph  $G$ . As a result, each outcome unit receives either treatment exposure 1 or 0 for every assignment  $\mathbf{Z}$ , and the stable unit treatment value assumption holds.

### 3 Proof of proposition 2

The first claim is an application of Gauss-Markov; the second claim is an application of Cramer-Rao.

For the sake of exposition, we assume that  $\beta = 0$  and  $\mathbf{Y} = \alpha \mathbf{e} + \epsilon$ , for all assignments  $\mathbf{Z}$ . The average treatment effect is equal to  $\alpha$ . Hence, we can restate our proposition with  $\hat{\tau}$  as estimators of  $\alpha$ .

For a fixed assignment vector  $\mathbf{Z}$ , the Cramer-Rao bound states that the variance of any unbiased estimator  $\hat{\tau}$  of  $\alpha$  is such that  $\text{Var}[\hat{\alpha}] \geq I(\alpha)^{-1}$ , where  $I(\alpha) = -E \left[ \frac{\delta^2 l(\mathbf{Y}, \mathbf{e}; \alpha)}{\delta \alpha^2} \right]$  is the Fisher information of  $\alpha$  and  $l$  is the log-likelihood of observing  $(\mathbf{Y}, \mathbf{e})$  given  $\alpha$  and  $\mathbf{Z}$ . With  $l(\mathbf{Y}, \mathbf{e}; \alpha) = -\frac{N}{2} \log(2\pi\sigma^2) + \sum_{i=1}^N \frac{(y_i - \alpha e_i)^2}{2\sigma^2}$ , we obtain  $I(\alpha) = \frac{1}{N}(\mathbf{e} - \bar{\mathbf{e}})^T(\mathbf{e} - \bar{\mathbf{e}})$ . By the law of total variance:

$$\text{Var}_{\mathbf{Z}, \epsilon} = E_{\mathbf{Z}}[\text{Var}_{\epsilon}[\hat{\tau}|\mathbf{Z}]] + \text{Var}_{\mathbf{Z}}[E_{\epsilon}[\hat{\tau}|\mathbf{Z}]] = E_{\mathbf{Z}}[\text{Var}_{\epsilon}[\hat{\tau}|\mathbf{Z}]] + \text{Var}_{\mathbf{Z}}[\alpha] = E_{\mathbf{Z}}[\text{Var}_{\epsilon}[\hat{\tau}|\mathbf{Z}]]$$

Hence the result becomes:

$$\text{Var}_{\mathbf{Z}, \epsilon}[\hat{\tau}] \geq E_{\mathbf{Z}} \left[ \frac{\sigma^2}{\frac{1}{N}(\mathbf{e} - \bar{\mathbf{e}})^T(\mathbf{e} - \bar{\mathbf{e}})} \right] \geq \frac{\sigma^2}{E_{\mathbf{Z}}[\frac{1}{N}(\mathbf{e} - \bar{\mathbf{e}})^T(\mathbf{e} - \bar{\mathbf{e}})]}$$

### 4 Proof of Theorem 1

Let  $\Phi \in R^{N \times M}$  be the adjacency matrix of the bipartite graph between diversion units and outcome units, such that  $\Phi_{ij} = w_{ij}$  and  $\phi_j = \vec{w}_{\cdot j}$ . Because  $\mathbf{e}(\mathbf{Z}) = \Phi \mathbf{Z}$ , the variance-maximization objective in Eq. 3 can be rewritten as

$$\frac{1}{N} (\mathbf{e}(\mathbf{Z}) - \bar{\mathbf{e}}(\mathbf{Z}))^T (\mathbf{e}(\mathbf{Z}) - \bar{\mathbf{e}}(\mathbf{Z})) = \frac{1}{N} \mathbf{Z}^T \Phi^T \Phi \mathbf{Z} - \left( \frac{1}{N} \mathbf{1}^T \Phi \mathbf{Z} \right)^2$$

Let  $p$  be the probability that a diversion unit is assigned to treatment and  $\Sigma = E_{\mathbf{Z}}[\mathbf{Z}^T \mathbf{Z}]$  be the variance-covariance matrix of  $\mathbf{Z}$ . Taking the expectation of the quadratic form in  $\mathbf{Z}$ ,

$$E_{\mathbf{Z}} \left[ \frac{1}{N} \mathbf{Z}^T \Phi^T \Phi \mathbf{Z} \right] = \frac{1}{N} (\text{Tr} [\Phi^T \Phi \Sigma] + p^2 \mathbf{1}^T \Phi^T \Phi \mathbf{1}) = \frac{1}{N} \text{Tr} [\Phi^T \Phi \Sigma] + p^2,$$

where the second equality is obtained by observing that  $\Phi \vec{1} = \vec{1}$ . If two diversion units  $j$  and  $k$  belong to the same cluster  $\mathcal{C}$ , then  $\Sigma_{jk} = p$ ; otherwise,  $\Sigma_{jk} = p^2$ . Hence,

$$\text{Tr} [\Phi^T \Phi \Sigma] = \sum_{\mathcal{C}} \sum_{j, k \in \mathcal{C}^2} p (\Phi^T \Phi)_{jk} + \sum_{\mathcal{C} \neq \mathcal{C}'} \sum_{j \in \mathcal{C}, k \in \mathcal{C}'} p^2 (\Phi^T \Phi)_{jk}$$

Because  $(\Phi^T \Phi)_{jk} = \langle \phi_j, \phi_k \rangle$  and  $\sum_{jk} \langle \phi_j, \phi_k \rangle = N$ , the above becomes

$$E_{\mathbf{Z}} \left[ \frac{1}{N} \mathbf{Z}^T \Phi^T \Phi \mathbf{Z} \right] = p^2 + p - \frac{p(1-p)}{N} \sum_{\mathcal{C} \neq \mathcal{C}'} \sum_{j \in \mathcal{C}, k \in \mathcal{C}'} \langle \phi_j, \phi_k \rangle$$

Taking the expectation of the second term of the objective,

$$\begin{aligned}
E_{\mathbf{Z}} \left[ \left( \frac{1}{N} \mathbf{1}^T \Phi \mathbf{Z} \right)^2 \right] &= \frac{1}{N^2} \sum_{i,j,k,l} \Phi_{ij} \Phi_{lk} E_{\mathbf{Z}}[Z_j Z_k] \\
&= \frac{1}{N^2} \sum_{j,k} \langle \phi_j, \vec{1} \rangle \langle \phi_k, \vec{1} \rangle E_{\mathbf{Z}}[Z_j Z_k] \\
&= \frac{1}{N^2} \left( p \sum_{\mathcal{C}} \sum_{j,k \in \mathcal{C}} \langle \phi_j, \vec{1} \rangle \langle \phi_k, \vec{1} \rangle + p^2 \sum_{\mathcal{C} \neq \mathcal{C}'} \sum_{j \in \mathcal{C}, k \in \mathcal{C}'} \langle \phi_j, \vec{1} \rangle \langle \phi_k, \vec{1} \rangle \right)
\end{aligned}$$

Noting that  $\sum_{j,k=1}^M \langle \phi_j, \vec{1} \rangle \langle \phi_k, \vec{1} \rangle = N^2$ , the previous term becomes

$$E_{\mathbf{Z}} \left[ \left( \frac{1}{N} \mathbf{1}^T \Phi \mathbf{Z} \right)^2 \right] = \frac{p^2 N^2}{N^2} + \frac{p(1-p)}{N^2} \sum_{\mathcal{C}} \sum_{j,k \in \mathcal{C}} \langle \phi_j, \vec{1} \rangle \langle \phi_k, \vec{1} \rangle$$

The final objective can be written as:

$$\begin{aligned}
\Delta &= p - \frac{p(1-p)}{N} \sum_{\mathcal{C} \neq \mathcal{C}'} \sum_{j \in \mathcal{C}, k \in \mathcal{C}'} \langle \phi_j, \phi_k \rangle - \frac{p(1-p)}{N^2} \sum_{\mathcal{C}} \sum_{j,k \in \mathcal{C}} \langle \phi_j, \vec{1} \rangle \langle \phi_k, \vec{1} \rangle \\
&= p^2 + \frac{p(1-p)}{N} \sum_{\mathcal{C}} \sum_{j,k \in \mathcal{C}} \left( \langle \phi_j, \phi_k \rangle - \frac{1}{N} \langle \phi_j, \vec{1} \rangle \langle \phi_k, \vec{1} \rangle \right)
\end{aligned}$$

Let  $W_{jk} = \langle \phi_j, \phi_k \rangle - \frac{1}{N} \langle \phi_j, \vec{1} \rangle \langle \phi_k, \vec{1} \rangle$ ,  $W_{jk}^+ = \max(0, W_{jk})$  and  $W_{jk}^- = \min(0, W_{jk})$  be the positive and negative edges of the graph respectively, and  $W^- = \sum_{j,k}^N W_{jk}^-$  be the sum of all negative edges in the graph. The objective becomes:

$$\Delta = p^2 + \frac{p(1-p)}{N} \left( W^- + \sum_{\mathcal{C}} \sum_{j,k \in \mathcal{C}} W_{jk}^+ - \sum_{\mathcal{C} \neq \mathcal{C}'} \sum_{j \in \mathcal{C}', k \in \mathcal{C}} W_{jk}^- \right)$$

## References

- Keisuke Hirano and Guido W Imbens. 2004. The propensity score with continuous treatments. *Applied Bayesian modeling and causal inference from incomplete-data perspectives* 226164 (2004), 73–84.
- Kosuke Imai and David A Van Dyk. 2004. Causal inference with general treatment regimes: Generalizing the propensity score. *J. Amer. Statist. Assoc.* 99, 467 (2004), 854–866.
